# Supplementary material for: Effectiveness of Live-Attenuated Genotype III Japanese Encephalitis Viral Vaccine against Circulating Genotype I Viruses in Swine
Source: MDPI journal article supplement (doi:10.3390/v14010114), 2022-01-09
Supplement: s1 [file s1]

## Supplementary Materials

**Table S1. List of JEV-positive aborted fetus**

| Farm | JEV vaccination | Date of abortion | JEV genotype | Remark      |
|------|-----------------|------------------|--------------|-------------|
| B    | Yes             | 2017.04.27       | I            |             |
| C    | Yes             | 2017.05.23       | I            |             |
| D    | Yes             | 2016.04.02       | I            |             |
| D    | Yes             | 2017.05.14       | I            | Same litter |
| D    | Yes             | 2017.05.14       | I            |             |
| D    | Yes             | 2017.05.30       | I            |             |
| D    | Yes             | 2017.06.06       | I            | Same litter |
| D    | Yes             | 2017.06.06       | I            |             |
| E    | No              | 2016.04.11       | I            |             |
| E    | No              | 2017.04.11       | I            | Same litter |
| E    | No              | 2017.04.11       | I            |             |
| E    | No              | 2017.04.30       | I            |             |
| E    | No              | 2017.05.01       | I            | Same litter |
| E    | No              | 2017.05.01       | I            |             |
| E    | No              | 2017.05.04       | I            |             |
| F    | No              | 2016.05.17       | I            | Same litter |
| F    | No              | 2016.05.17       | I            |             |
| F    | No              | 2016.05.18       | I            |             |
| F    | No              | 2017.04.26       | I            |             |
| F    | No              | 2017.05.09       | I            | Same litter |
| F    | No              | 2017.05.09       | I            |             |
| F    | No              | 2017.05.09       | I            | Same litter |
| F    | No              | 2017.05.09       | I            |             |
| F    | No              | 2017.05.10       | I            | Same litter |
| F    | No              | 2017.05.10       | I            |             |
| F    | No              | 2017.05.10       | I            |             |
| F    | No              | 2017.05.12       | I            |             |

**Table S2. List of the full-length E sequences of JEV-positive mosquitoes and aborted fetuses obtained in this study.**

| Name                    | Farm | Time       | Host                         | Genotype | Accession no. |
|-------------------------|------|------------|------------------------------|----------|---------------|
| TC2016-1/Taiwan/2016/Sw | D    | 2016.04.02 | Swine                        | I        | MZ733971      |
| TC2016-2/Taiwan/2016/Sw | F    | 2016.05.17 | Swine                        | I        | MZ733972      |
| TC2017-1/Taiwan/2017/Sw | D    | 2017.06.06 | Swine                        | I        | MZ733961      |
| TC2017-2/Taiwan/2017/Sw | E    | 2017.05.01 | Swine                        | I        | MZ733962      |
| TC2017-3/Taiwan/2017/Sw | F    | 2017.05.09 | Swine                        | I        | MZ733963      |
| TC2017-4/Taiwan/2017/Sw | F    | 2017.05.12 | Swine                        | I        | MZ733964      |
| TC2017-1/Taiwan/2017/Mq | A    | 2017.05.05 | <i>Cx. tritaeniorhynchus</i> | I        | MZ733965      |
| TC2017-2/Taiwan/2017/Mq | C    | 2017.05.05 | <i>Cx. tritaeniorhynchus</i> | I        | MZ733966      |
| TC2017-3/Taiwan/2017/Mq | D    | 2017.05.29 | <i>Cx. tritaeniorhynchus</i> | I        | MZ733967      |
| TC2017-4/Taiwan/2017/Mq | E    | 2017.05.06 | <i>Cx. tritaeniorhynchus</i> | I        | MZ733968      |
| TC2017-5/Taiwan/2017/Mq | E    | 2017.05.06 | <i>Cx. tritaeniorhynchus</i> | I        | MZ733969      |
| TC2017-6/Taiwan/2017/Mq | F    | 2017.05.10 | <i>Cx. tritaeniorhynchus</i> | I        | MZ733970      |
